# Supplementary material for: Polarity-Dependent Asymmetric Distribution and MEX-5/6–Mediated Translational Activation of the Era-1 mRNA in C. elegans Embryos
Source: PubMed Central journal article supplement (PMC4378847; doi:10.1371/journal.pone.0120984), 2015-03-30

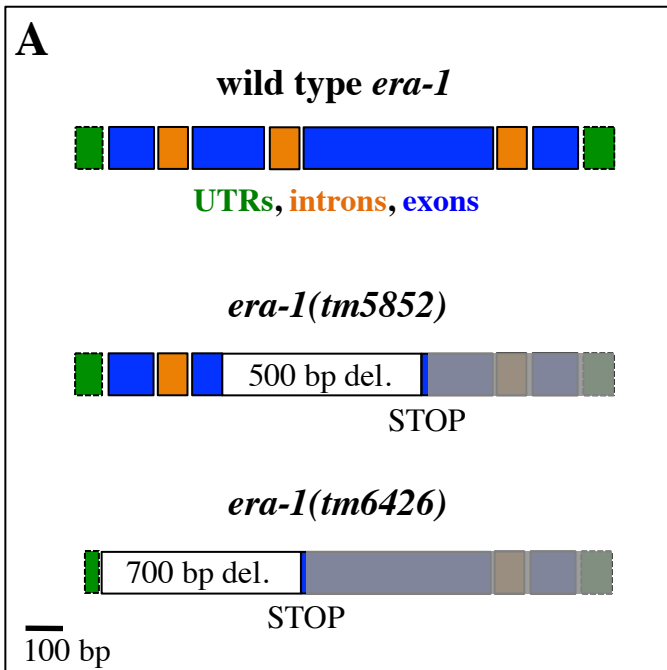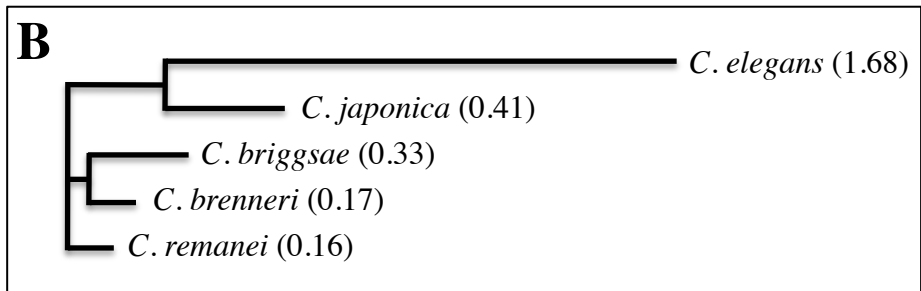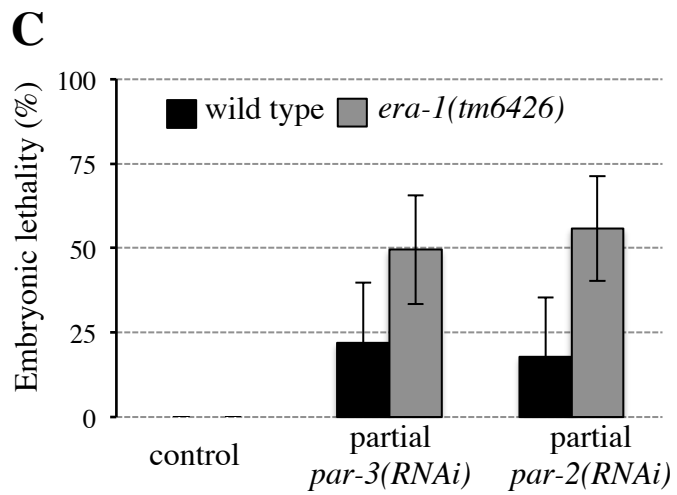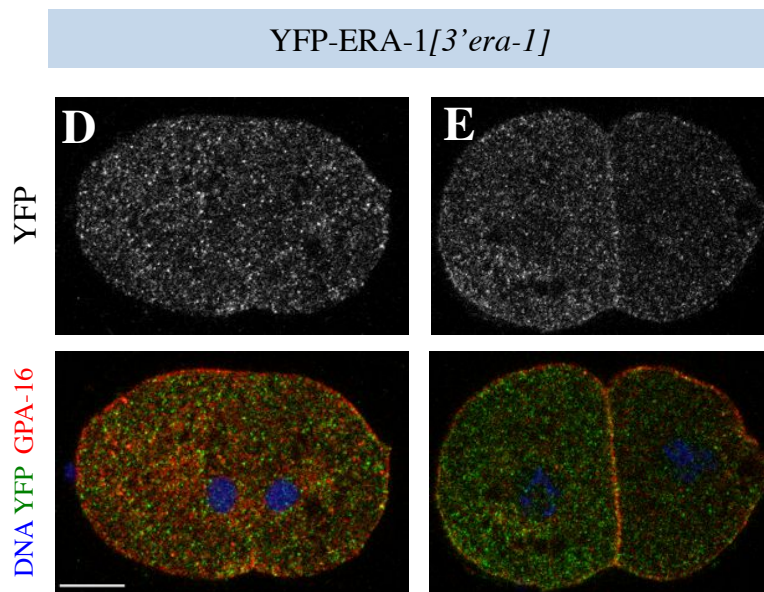

Supplement: pone.0120984.s001.pdf [file pone.0120984.s001.pdf]
