# Supplementary material for: Polarity-Dependent Asymmetric Distribution and MEX-5/6–Mediated Translational Activation of the Era-1 mRNA in C. elegans Embryos
Source: PLoS One. 2015 Mar 30;10(3):e0120984. doi: 10.1371/journal.pone.0120984 (PMC4378847; doi:10.1371/journal.pone.0120984)
Supplement: S1 Table — The designation of the experiment (first column), the nature of the measurement (second column), the genotype/RNAi condition (A: anterior side, P: posterior side) (third column), the actual value (fourth column), the number of embryos or experiments analyzed (fifth column), the p-value using unpaired Student’s t-test (sixth column) and the corresponding Figure (last column) are reported. (PDF) [file pone.0120984.s003.pdf]

| experiment                         | measurement          | genotype and condition                           | value (mean ± SD) | n       | p-value                                   | related Figure  |
|------------------------------------|----------------------|--------------------------------------------------|-------------------|---------|-------------------------------------------|-----------------|
|                                    |                      |                                                  |                   |         | <b>A vs. P</b>                            |                 |
| <i>era-1</i> mRNA distribution     | mRNA levels          | wild type A                                      | 11.5 ± 1.7        | 9       | 5.67×10 <sup>-10</sup>                    | Figure 1I       |
|                                    |                      | wild type P                                      | 4.1 ± 0.9         | 9       |                                           |                 |
|                                    |                      | <i>era-1(RNAi)</i> A                             | 1.3 ± 0.2         | 12      | 0.326                                     |                 |
|                                    |                      | <i>era-1(RNAi)</i> P                             | 1.2 ± 0.2         | 12      |                                           |                 |
|                                    |                      | <i>par-3(RNAi)</i> A                             | 9.1 ± 2.9         | 10      | 0.907                                     |                 |
|                                    |                      | <i>par-3(RNAi)</i> P                             | 9 ± 2.9           | 10      |                                           |                 |
|                                    |                      | <i>mex-5(RNAi)</i> A                             | 9.5 ± 1.8         | 7       | 0.287                                     |                 |
|                                    |                      | <i>mex-5(RNAi)</i> P                             | 8.4 ± 1.8         | 7       |                                           |                 |
|                                    |                      |                                                  |                   |         |                                           |                 |
| <i>yfp</i> mRNA distribution       | mRNA levels          | <i>yfp-era-1[3'era-1]</i> A                      | 6.9 ± 0.7         | 9       | 1.03×10 <sup>-7</sup>                     | Figure 2G       |
|                                    |                      | <i>yfp-era-1[3'era-1]</i> P                      | 3.4 ± 0.9         | 9       |                                           |                 |
|                                    |                      | <i>yfp[3'era-1]</i> A                            | 2.7 ± 0.6         | 8       | 2×10 <sup>-4</sup>                        |                 |
|                                    |                      | <i>yfp[3'era-1]</i> P                            | 1.9 ± 0.4         | 8       |                                           |                 |
|                                    |                      | <i>yfp-era-1[3'pie-1]</i> A                      | 3.2 ± 0.8         | 10      | 0.362                                     |                 |
|                                    |                      | <i>yfp-era-1[3'pie-1]</i> P                      | 2.9 ± 0.8         | 10      |                                           |                 |
|                                    |                      |                                                  |                   |         |                                           |                 |
| YFP membrane enrichment            | relative YFP levels  |                                                  |                   |         | <b>control vs. RNAi-treated</b>           |                 |
|                                    |                      | <i>yfp-era-1[3'era-1]</i> control A              | 2.1 ± 0.6         | 10      | -                                         | Figure 4E       |
|                                    |                      | <i>yfp-era-1[3'era-1]</i> control P              | 0.8 ±0.3          | 10      | -                                         |                 |
|                                    |                      | <i>yfp-era-1[3'era-1]</i> <i>mex-5/6(RNAi)</i> A | 0.5 ± 0.1         | 10      | 4.42×10 <sup>-7</sup>                     |                 |
|                                    |                      | <i>yfp-era-1[3'era-1]</i> <i>mex-5/6(RNAi)</i> P | 0.5 ± 0.1         | 10      | 1.46×10 <sup>-3</sup>                     |                 |
|                                    |                      | <i>yfp-era-1[3'era-1]</i> <i>par-3(RNAi)</i> A   | 1.4 ± 0.5         | 9       | 9.32×10 <sup>-3</sup>                     |                 |
|                                    |                      | <i>yfp-era-1[3'era-1]</i> <i>par-3(RNAi)</i> P   | 1.3 ± 0.5         | 9       | 0.04                                      |                 |
|                                    |                      | <i>yfp-era-1[3'era-1]</i> <i>par-1(RNAi)</i> A   | 2.2 ± 0.6         | 10      | 0.741                                     |                 |
|                                    |                      | <i>yfp-era-1[3'era-1]</i> <i>par-1(RNAi)</i> P   | 2.1 ± 0.6         | 10      | 1.81×10 <sup>-5</sup>                     |                 |
|                                    |                      |                                                  |                   |         | <b>control vs. RNAi-treated</b>           |                 |
|                                    |                      | <i>yfp-era-1[3'pie-1]</i> control A              | 3.9 ± 0.8         | 10      | -                                         | Figure 4H       |
|                                    |                      | <i>yfp-era-1[3'pie-1]</i> control P              | 3.7 ± 0.9         | 10      | -                                         |                 |
|                                    |                      | <i>yfp-era-1[3'pie-1]</i> <i>mex-5/6(RNAi)</i> A | 3.3 ± 1           | 8       | 0.113                                     |                 |
|                                    |                      | <i>yfp-era-1[3'pie-1]</i> <i>mex-5/6(RNAi)</i> P | 3.2 ± 0.8         | 8       | 0.205                                     |                 |
|                                    |                      |                                                  |                   |         |                                           |                 |
|                                    |                      |                                                  |                   |         | <b>wild type vs. <i>era-1(tm6426)</i></b> |                 |
| <i>era-1(tm6426)</i> embryogenesis | embryonic lethality  | wild type partial <i>par-3(RNAi)</i>             | 21.9 ± 18         | 8 exps. | -                                         | Suppl. Fig. S1C |
|                                    |                      | <i>era-1(tm6426)</i> partial <i>par-3(RNAi)</i>  | 49.5 ± 16         | 8 exps. | 4.6×10 <sup>-3</sup>                      |                 |
|                                    |                      | wild type partial <i>par-2(RNAi)</i>             | 17.9 ± 17.5       | 3 exps. | -                                         |                 |
|                                    |                      | <i>era-1(tm6426)</i> partial <i>par-2(RNAi)</i>  | 55.7 ± 15.4       | 3 exps. | 0.048                                     |                 |
|                                    |                      |                                                  |                   |         |                                           |                 |
|                                    |                      |                                                  |                   |         | <b>control vs. <i>mex-5(RNAi)</i></b>     |                 |
| qPCR                               | relative mRNA levels | <i>yfp-era-1[3'era-1]</i> control                | 7.3 ± 3.8         | 3 exps. | -                                         | Suppl. Fig. S2B |
|                                    |                      | <i>yfp-era-1[3'era-1]</i> <i>mex-5(RNAi)</i>     | 4.7 ± 3.2         | 3 exps. | 0.429                                     |                 |
|                                    |                      | <i>yfp[3'era-1]</i> control                      | 3.3 ± 1.3         | 3 exps. | -                                         |                 |
|                                    |                      | <i>yfp[3'era-1]</i> <i>mex-5(RNAi)</i>           | 1.9 ±1.2          | 3 exps. | 0.234                                     |                 |
|                                    |                      | <i>yfp-era-1[3'pie-1]</i> control                | 3.7 ± 1.1         | 3 exps. | -                                         |                 |
|                                    |                      | <i>yfp-era-1[3'pie-1]</i> <i>mex-5(RNAi)</i>     | 5.1 ± 1.7         | 3 exps. | 0.284                                     |                 |
|                                    |                      |                                                  |                   |         |                                           |                 |
|                                    |                      |                                                  |                   |         | <b>control vs. RNAi-treated</b>           |                 |
| YFP membrane enrichment            | relative YFP levels  | <i>yfp-era-1[3'era-1]</i> control A              | 1.4 ± 0.4         | 11      | -                                         | Suppl. Fig. S2C |
|                                    |                      | <i>yfp-era-1[3'era-1]</i> control P              | 0.6 ± 0.2         | 11      | -                                         |                 |
|                                    |                      | <i>yfp-era-1[3'era-1]</i> <i>mex-5(RNAi)</i> A   | 0.9 ± 0.4         | 7       | 0.021                                     |                 |
|                                    |                      | <i>yfp-era-1[3'era-1]</i> <i>mex-5(RNAi)</i> P   | 0.4 ± 0.1         | 7       | 0.012                                     |                 |
|                                    |                      | <i>yfp-era-1[3'era-1]</i> <i>mex-3(RNAi)</i> A   | 1.4 ± 0.4         | 7       | 0.465                                     |                 |
|                                    |                      | <i>yfp-era-1[3'era-1]</i> <i>mex-3(RNAi)</i> P   | 0.6 ± 0.1         | 7       | 0.124                                     |                 |
|                                    |                      |                                                  |                   |         |                                           |                 |

Supplemental Table S1
